# Supplementary material
Source: HighWire-hosted journal article supplement (https://erj.ersjournals.com/content/51/3/1700577)
Supplement: inline-supplementary-material-2 [file inline-supplementary-material-2.pdf]

Survival analysis for the 5 stages based on z score (proposed by Quanjer *et al.*)  
(Log rank test  $P = 0.03$ )

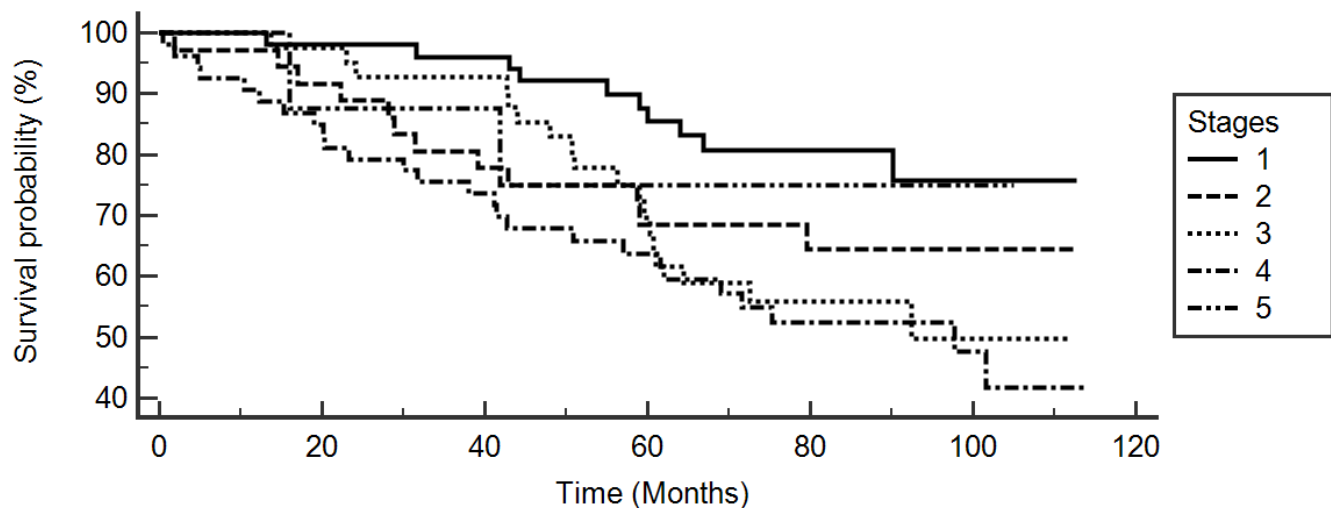

| Number at risk |    |    |    |    |    |    |
|----------------|----|----|----|----|----|----|
| Stage: 1       | 51 | 50 | 49 | 38 | 21 | 13 |
| Stage: 2       | 36 | 33 | 28 | 21 | 16 | 7  |
| Stage: 3       | 41 | 40 | 38 | 26 | 19 | 2  |
| Stage: 4       | 53 | 45 | 39 | 30 | 21 | 9  |
| Stage: 5       | 8  | 7  | 7  | 6  | 3  | 2  |

SUPPLEMENTARY FIGURE S2 a)

## SUPPLEMENTARY FIGURE S2 Kaplan–Meier survival curves according to the stages of COPD

based on: a) z scores of  $FEV_1$  using the 5-stage cutoff values as proposed by Quanjer *et al.* [1]; b)

$FEV_1 \cdot Ht^{-3}$  using quintiles as cutoff values as proposed by Pedone *et al.* [2]

## REFERENCES FOR SUPPLEMENTARY FIGURE S2

- 1 Quanjer PH, Pretto JJ, Brazzale DJ, *et al.* Grading the severity of airways obstruction: new wine in new bottles. *Eur Respir J* 2014; 43: 505–512.
- 2 Pedone C, Scarlata S, Scichilone N, *et al.* Alternative ways of expressing  $FEV_1$  and mortality in elderly people with and without COPD. *Eur Respir J* 2013; 41: 800–805.

Survival analysis for stages based on quintiles of  $(FEV_1)/(Ht^3)$

(Log rank test  $P = 0.005$ )

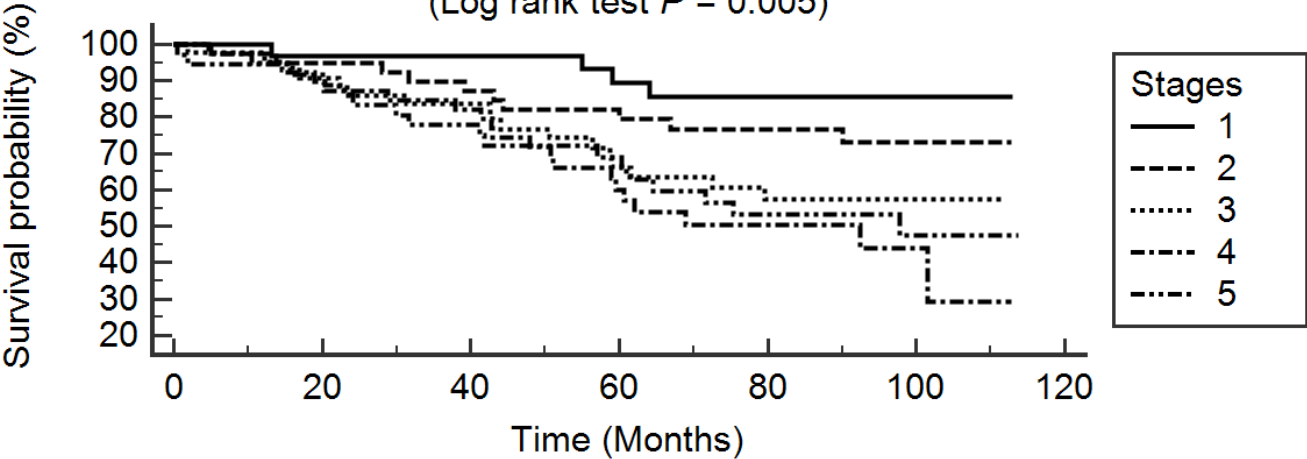

Number at risk

|          |    |    |    |    |    |    |   |
|----------|----|----|----|----|----|----|---|
| Stage: 1 | 32 | 31 | 31 | 24 | 11 | 7  | 0 |
| Stage: 2 | 39 | 37 | 34 | 30 | 24 | 11 | 0 |
| Stage: 3 | 43 | 39 | 36 | 25 | 17 | 4  | 0 |
| Stage: 4 | 39 | 35 | 32 | 20 | 13 | 3  | 0 |
| Stage: 5 | 36 | 33 | 28 | 22 | 15 | 8  | 0 |

SUPPLEMENTARY FIGURE S2 b)
