# Supplementary material
Source: HighWire-hosted journal article supplement (https://erj.ersjournals.com/content/51/3/1700577)
Supplement: inline-supplementary-material-3 [file inline-supplementary-material-3.pdf]

SUPPLEMENTARY TABLE S1 Single-variate logistic regression and Cox regression with bootstrapping on the risks of the major adverse outcomes

| Method of staging<br>(cutoff values)                             | Crude OR for $\geq 1$<br>SAE at 1 year by<br>bootstrapping <sup>#</sup><br>(95% CI) | Crude OR for $\geq 2$<br>SAE at 1 year by<br>bootstrapping <sup>#</sup><br>(95% CI) | Crude OR for $\geq 1$<br>SAE every year at<br>2 years by<br>bootstrapping <sup>#</sup><br>(95% CI) | Crude HR for<br>mortality by<br>bootstrapping <sup>#</sup><br>(95% CI) |
|------------------------------------------------------------------|-------------------------------------------------------------------------------------|-------------------------------------------------------------------------------------|----------------------------------------------------------------------------------------------------|------------------------------------------------------------------------|
| <b>FEV<sub>1</sub>%pred (GOLD)</b>                               |                                                                                     |                                                                                     |                                                                                                    |                                                                        |
| 1 ( $\geq 80\%$ )                                                | 1                                                                                   | 1                                                                                   | 1                                                                                                  | 1                                                                      |
| 2 ( $\geq 50\%$ and $< 80$ )                                     | 0.83 (0.82-0.84)*                                                                   | 0.25 (0.24-0.26)*                                                                   | 0.81 (0.79-0.83)*                                                                                  | 1.63 (1.55-1.72)*                                                      |
| 3 ( $\geq 30\%$ and $< 50$ )                                     | 4.44 (4.35-4.53)*                                                                   | 5.93 (5.81-6.05)*                                                                   | 4.90 (4.76-5.00)*                                                                                  | 3.42 (3.25-3.60)*                                                      |
| 4 ( $< 30\%$ )                                                   | 2.34 (2.29-2.39)*                                                                   | 2.92 (2.83-3.00)*                                                                   | 2.86 (2.77-2.94)*                                                                                  | 4.44 (4.18-4.71)*                                                      |
| <b>FEV<sub>1</sub>%pred (quartiles)</b>                          |                                                                                     |                                                                                     |                                                                                                    |                                                                        |
| 1 ( $\geq 69.3\%$ )                                              | 1                                                                                   | 1                                                                                   | 1                                                                                                  | 1                                                                      |
| 2 ( $\geq 53.6\%$ and $< 69.3$ )                                 | 0.78 (0.76-0.79)*                                                                   | 0.98 (0.95-1.01)                                                                    | 1.79 (1.73-1.84)*                                                                                  | 2.27 (2.23-2.29)*                                                      |
| 3 ( $\geq 41.0\%$ and $< 53.6$ )                                 | 5.81 (5.70-5.87)*                                                                   | 8.41 (8.25-8.58)*                                                                   | 10.70 (10.49-11.02)*                                                                               | 3.29 (3.25-3.35)*                                                      |
| 4 ( $< 41.0\%$ )                                                 | 4.10 (4.01-4.14)*                                                                   | 10.59 (10.38-10.80)*                                                                | 8.41 (8.25-8.58)*                                                                                  | 3.97 (3.94-4.06)*                                                      |
| <b>Z score (quartiles)</b>                                       |                                                                                     |                                                                                     |                                                                                                    |                                                                        |
| 1 ( $\geq -1.70$ )                                               | 1                                                                                   | 1                                                                                   | 1                                                                                                  | 1                                                                      |
| 2 ( $\geq -2.57$ and $< -1.70$ )                                 | 0.80 (0.78-0.82)*                                                                   | 0.41 (0.41-10.80)                                                                   | 0.41 (0.40-0.41)*                                                                                  | 1.92 (1.88-1.93)*                                                      |
| 3 ( $\geq -3.17$ and $< -2.57$ )                                 | 7.39 (7.24-7.46)*                                                                   | 12.94 (12.55-13.20)*                                                                | 15.03 (14.73-15.33)*                                                                               | 3.46 (3.42-3.53)*                                                      |
| 4 ( $< -3.17$ )                                                  | 3.06 (3.00-3.13)*                                                                   | 7.69 (7.54-7.85)*                                                                   | 7.39 (7.17-7.54)*                                                                                  | 2.89 (2.86-2.94)*                                                      |
| <b>(FEV<sub>1</sub>·Ht<sup>-2</sup>)<sub>A</sub> (quartiles)</b> |                                                                                     |                                                                                     |                                                                                                    |                                                                        |
| 1 ( $\geq 0.63$ )                                                | 1                                                                                   | 1                                                                                   | 1                                                                                                  | 1                                                                      |
| 2 ( $\geq 0.47$ and $< 0.63$ )                                   | 1.08 (1.06-1.11)*                                                                   | 1.60 (1.57-1.65)*                                                                   | 1.68 (1.63-1.72)*                                                                                  | 1.36 (1.35-1.39)*                                                      |
| 3 ( $\geq 0.36$ and $< 0.47$ )                                   | 3.63 (3.56-3.67)*                                                                   | 7.32 (7.17-7.46)*                                                                   | 3.32 (3.25-3.39)*                                                                                  | 4.39 (4.35-4.48)*                                                      |
| 4 ( $< 0.36$ )                                                   | 4.06 (4.01-4.14)*                                                                   | 12.55 (12.18-12.81)*                                                                | 6.23 (6.05-6.36)*                                                                                  | 3.22 (3.16-3.29)*                                                      |
| <b>(FEV<sub>1</sub>·Ht<sup>-2</sup>)<sub>B</sub><sup>¶</sup></b> |                                                                                     |                                                                                     |                                                                                                    |                                                                        |
| 1 ( $\geq 0.50$ )                                                | 1                                                                                   | 1                                                                                   | 1                                                                                                  | 1                                                                      |
| 2 ( $\geq 0.40$ and $< 0.30$ )                                   | 1.65 (1.62-1.67)*                                                                   | 2.97 (2.89-3.03)*                                                                   | 1.45 (1.40-1.48)*                                                                                  | 2.20 (2.18-2.23)*                                                      |
| 3 ( $\geq 0.30$ and $< 0.40$ )                                   | 5.21 (5.16-5.26)*                                                                   | 11.70 (11.36-11.94)*                                                                | 5.37 (5.26-5.47)*                                                                                  | 2.89 (2.86-2.92)*                                                      |
| 4 ( $< 0.30$ )                                                   | 4.62 (4.57-4.71)*                                                                   | 14.15 (13.74-14.44)*                                                                | 7.54 (7.39-7.69)*                                                                                  | 5.16 (5.05-5.20)*                                                      |
| <b>FEV<sub>1</sub>·Ht<sup>-3</sup> (quartiles)</b>               |                                                                                     |                                                                                     |                                                                                                    |                                                                        |
| 1 ( $\geq 0.38$ )                                                | 1                                                                                   | 1                                                                                   | 1                                                                                                  | 1                                                                      |
| 2 ( $\geq 0.29$ and $< 0.38$ )                                   | 1.48 (1.45-1.49)*                                                                   | 2.77 (2.69-2.83)*                                                                   | 1.97 (1.92-2.01)*                                                                                  | 1.70 (1.67-1.73)*                                                      |
| 3 ( $\geq 0.22$ and $< 0.29$ )                                   | 3.94 (3.90-4.01)*                                                                   | 6.42 (6.23-6.55)*                                                                   | 3.97 (3.90-4.06)*                                                                                  | 4.53 (4.44-4.62)*                                                      |
| 4 ( $< 0.22$ )                                                   | 3.86 (3.78-3.90)*                                                                   | 13.87 (13.60-14.15)*                                                                | 6.17 (5.99-6.30)*                                                                                  | 3.22 (3.16-3.25)*                                                      |
| <b>FEV<sub>1</sub>Q (quartiles)</b>                              |                                                                                     |                                                                                     |                                                                                                    |                                                                        |

|                                |                   |                      |                   |                   |
|--------------------------------|-------------------|----------------------|-------------------|-------------------|
| 1 ( $\geq 3.38$ )              | 1                 | 1                    | 1                 | 1                 |
| 2 ( $\geq 2.50$ and $< 3.38$ ) | 1.88 (1.84-1.90)* | 1.70 (1.65-1.73)*    | 1.38 (1.34-1.40)* | 2.34 (2.27-2.39)* |
| 3 ( $\geq 1.90$ and $< 2.50$ ) | 3.22 (3.16-3.29)* | 7.39 (7.24-7.54)*    | 3.49 (3.42-3.56)* | 4.48 (4.39-4.62)* |
| 4 ( $< 1.90$ )                 | 5.21 (5.10-5.26)* | 10.70 (10.49-11.02)* | 6.17 (6.05-6.30)* | 5.21 (5.05-5.37)* |

FEV<sub>1</sub>, forced expiratory volume in 1 second; FEV<sub>1</sub>%pred, percentage of predicted FEV<sub>1</sub>; FEV<sub>1</sub>·Ht<sup>-2</sup>, FEV<sub>1</sub> over height squared; FEV<sub>1</sub>·Ht<sup>-3</sup>, FEV<sub>1</sub> over height cubed; FEV<sub>1</sub>Q, FEV<sub>1</sub> quotient; GOLD, the Global Initiative for Chronic Obstructive Lung Disease; OR, odds ratio; SAE, severe acute exacerbation; 95% CI, 95% confidence interval; HR, hazard ratio.

# : Bootstrapping was performed using SAS (version 9.4, SAS Institute, Cary, North Carolina) with 5000 random samplings with replacement. ¶ The cutoff values (0.5, 0.4, 0.3) were proposed by Miller *et al* [1]. \* :  $P < 0.05$ .

## REFERENCE FOR SUPPLEMENTARY TABLE S1:

1 Miller MR, Pedersen OF, Dirksen A. A new staging strategy for chronic obstructive pulmonary disease. *Int J Chron Obstruct Pulmon Dis* 2007; 2(4): 657–663.
