# Supplementary material
Source: HighWire-hosted journal article supplement (https://erj.ersjournals.com/content/51/3/1700577)
Supplement: inline-supplementary-material-4 [file inline-supplementary-material-4.pdf]

**SUPPLEMENTARY TABLE S2 Multi-variate logistic regression and Cox regression with bootstrapping on the risks of the major adverse outcomes**

| Method of staging<br>(cutoff values)                             | Adjusted OR for<br>≥ 1 SAE at 1 year by<br>bootstrapping <sup>#</sup><br>(95% CI) | Adjusted OR for<br>≥ 2 SAE at 1 year by<br>bootstrapping <sup>#</sup><br>(95% CI) | Adjusted OR for<br>≥ 1 SAE every year at<br>2 years by<br>bootstrapping <sup>#</sup><br>(95% CI) | Adjusted HR for<br>mortality by<br>bootstrapping <sup>#</sup><br>(95% CI) |
|------------------------------------------------------------------|-----------------------------------------------------------------------------------|-----------------------------------------------------------------------------------|--------------------------------------------------------------------------------------------------|---------------------------------------------------------------------------|
| <b>FEV<sub>1</sub>%pred (GOLD)</b>                               |                                                                                   |                                                                                   |                                                                                                  |                                                                           |
| 1 (≥80%)                                                         | 1                                                                                 | 1                                                                                 | 1                                                                                                | 1                                                                         |
| 2 (≥50% and <80)                                                 | 0.90 (0.87-0.91)*                                                                 | 0.23 (0.22-0.23)*                                                                 | 1.11 (1.08-1.14)*                                                                                | 1.52 (1.48-1.65)*                                                         |
| 3 (≥30% and <50)                                                 | 4.10 (4.01-4.18)*                                                                 | 3.78 (3.71-3.86)*                                                                 | 6.55 (6.42-6.69)*                                                                                | 2.75 (2.59-2.89)*                                                         |
| 4 (<30%)                                                         | 2.12 (2.05-2.18)*                                                                 | 1.38 (1.34-1.42)*                                                                 | 4.66 (4.48-4.81)*                                                                                | 5.26 (4.95-5.58)*                                                         |
| <b>FEV<sub>1</sub>%pred (quartiles)</b>                          |                                                                                   |                                                                                   |                                                                                                  |                                                                           |
| 1 (≥69.3%)                                                       | 1                                                                                 | 1                                                                                 | 1                                                                                                | 1                                                                         |
| 2 (≥53.6% and <69.3)                                             | 0.65 (0.63-0.66)*                                                                 | 0.73 (0.70-0.75)*                                                                 | 2.05 (2.01-2.12)*                                                                                | 2.16 (2.14-2.20)*                                                         |
| 3 (≥41.0% and <53.6)                                             | 5.00 (4.90-5.10)*                                                                 | 6.23 (6.11-6.36)*                                                                 | 11.59 (11.36-11.82)*                                                                             | 2.92 (2.97-3.06)*                                                         |
| 4 (<41.0%)                                                       | 3.10 (3.03-3.16)*                                                                 | 6.11 (5.99-6.23)*                                                                 | 10.80 (10.49-11.02)*                                                                             | 3.35 (3.32-3.42)*                                                         |
| <b>Z score (quartiles)</b>                                       |                                                                                   |                                                                                   |                                                                                                  |                                                                           |
| 1 (≥-1.70)                                                       | 1                                                                                 | 1                                                                                 | 1                                                                                                | 1                                                                         |
| 2 (≥-2.57 and < -1.70)                                           | 0.66 (0.64-0.67)*                                                                 | 0.33 (0.32-0.33)*                                                                 | 0.46 (0.45-0.47)*                                                                                | 1.58 (1.57-1.60)*                                                         |
| 3 (≥-3.17 and < -2.57)                                           | 6.55 (6.42-6.69)*                                                                 | 10.91 (10.70-11.13)*                                                              | 22.65 (22.20-23.10)*                                                                             | 2.92 (2.89-2.94)*                                                         |
| 4 (<-3.17)                                                       | 2.94 (2.89-3.00)*                                                                 | 5.87 (5.75-5.99)*                                                                 | 15.96 (15.49-16.44)*                                                                             | 3.82 (3.74-3.86)*                                                         |
| <b>(FEV<sub>1</sub>·Ht<sup>-2</sup>)<sub>A</sub> (quartiles)</b> |                                                                                   |                                                                                   |                                                                                                  |                                                                           |
| 1 (≥0.63)                                                        | 1                                                                                 | 1                                                                                 | 1                                                                                                | 1                                                                         |
| 2 (≥0.47 and <0.63)                                              | 0.95 (0.93-0.97)*                                                                 | 1.54 (1.49-1.58)*                                                                 | 1.73 (1.68-1.77)*                                                                                | 1.01 (0.99-1.03)                                                          |
| 3 (≥0.36 and <0.47)                                              | 2.83 (2.77-2.89)*                                                                 | 5.42 (5.31-5.53)*                                                                 | 3.19 (3.13-3.25)*                                                                                | 2.86 (2.80-2.92)*                                                         |
| 4 (<0.36)                                                        | 2.92 (2.86-2.97)*                                                                 | 7.61 (7.46-7.77)*                                                                 | 6.42 (6.23-6.55)*                                                                                | 2.14 (2.10-2.18)*                                                         |
| <b>(FEV<sub>1</sub>·Ht<sup>-2</sup>)<sub>B</sub><sup>†</sup></b> |                                                                                   |                                                                                   |                                                                                                  |                                                                           |
| 1 (≥0.50)                                                        | 1                                                                                 | 1                                                                                 | 1                                                                                                | 1                                                                         |
| 2 (≥0.40 and < 0.30)                                             | 1.43 (1.42-1.46)*                                                                 | 2.36 (2.29-2.44)*                                                                 | 1.45 (1.42-1.49)*                                                                                | 2.08 (2.03-2.10)*                                                         |
| 3 (≥0.30 and < 0.40)                                             | 4.48 (4.39-4.53)*                                                                 | 9.21 (9.03-9.39)*                                                                 | 5.64 (5.53-5.75)*                                                                                | 2.01 (1.97-2.03)*                                                         |
| 4 (< 0.30)                                                       | 3.49 (3.42-3.56)*                                                                 | 8.76 (8.50-9.03)*                                                                 | 9.03 (8.76-9.21)*                                                                                | 5.05 (5.00-5.10)*                                                         |
| <b>FEV<sub>1</sub>·Ht<sup>-3</sup> (quartiles)</b>               |                                                                                   |                                                                                   |                                                                                                  |                                                                           |
| 1 (≥0.38)                                                        | 1                                                                                 | 1                                                                                 | 1                                                                                                | 1                                                                         |
| 2 (≥0.29 and <0.38)                                              | 1.35 (1.32-1.38)*                                                                 | 2.64 (2.59-2.72)*                                                                 | 2.12 (2.05-2.16)*                                                                                | 1.23 (1.21-1.26)*                                                         |
| 3 (≥0.22 and <0.29)                                              | 3.42 (3.35-3.46)*                                                                 | 5.37 (5.26-5.47)*                                                                 | 4.06 (3.94-4.14)*                                                                                | 3.00 (2.97-3.06)*                                                         |
| 4 (<0.22)                                                        | 2.75 (2.69-2.80)*                                                                 | 8.85 (8.67-9.03)*                                                                 | 6.42 (6.30-6.62)*                                                                                | 1.99 (1.97-2.03)*                                                         |
| <b>FEV<sub>1</sub>Q (quartiles)</b>                              |                                                                                   |                                                                                   |                                                                                                  |                                                                           |

|                                |                   |                   |                   |                   |
|--------------------------------|-------------------|-------------------|-------------------|-------------------|
| 1 ( $\geq 3.38$ )              | 1                 | 1                 | 1                 | 1                 |
| 2 ( $\geq 2.50$ and $< 3.38$ ) | 1.88 (1.84-1.92)* | 1.97 (1.92-2.03)* | 1.48 (1.43-1.52)* | 1.55 (1.51-1.60)* |
| 3 ( $\geq 1.90$ and $< 2.50$ ) | 2.75 (2.69-2.80)* | 5.87 (5.75-5.99)* | 3.67 (3.60-3.74)* | 2.86 (2.80-2.94)* |
| 4 ( $< 1.90$ )                 | 4.05 (3.97-4.14)* | 7.03 (6.89-7.17)* | 6.96 (6.82-7.10)* | 3.10 (3.00-3.19)* |

---

FEV<sub>1</sub>, forced expiratory volume in 1 second; FEV<sub>1</sub>%pred, percentage of predicted FEV<sub>1</sub>; FEV<sub>1</sub>·Ht<sup>-2</sup>, FEV<sub>1</sub> over height squared; FEV<sub>1</sub>·Ht<sup>-3</sup>, FEV<sub>1</sub> over height cubed; FEV<sub>1</sub>Q, FEV<sub>1</sub> quotient; GOLD, the Global Initiative for Chronic Obstructive Lung Disease; OR, odds ratio; SAE, severe acute exacerbation; 95% CI, 95% confidence interval; HR, hazard ratio. <sup>#</sup> : Adjustment was made for age, body mass index, Charlson comorbidity index, smoking status, and history of severe acute exacerbation in the preceding year; bootstrapping was performed using SAS (version 9.4, SAS Institute, Cary, North Carolina) with 5000 random samplings with replacement. <sup>¶</sup> The cutoff values (0.5, 0.4, 0.3) were proposed by Miller *et al* [1]. \* :  $P < 0.05$ .

---

## REFERENCE FOR SUPPLEMENTARY TABLE S2:

1 Miller MR, Pedersen OF, Dirksen A. A new staging strategy for chronic obstructive pulmonary disease. *Int J Chron Obstruct Pulmon Dis* 2007; 2(4): 657–663.
