# Supplementary material
Source: HighWire-hosted journal article supplement (https://erj.ersjournals.com/content/51/3/1700577)
Supplement: inline-supplementary-material-5 [file inline-supplementary-material-5.pdf]

**SUPPLEMENTARY TABLE S3 Performance of the staging methods based on z score and FEV<sub>1</sub>·Ht<sup>-3</sup> in predicting outcomes when using 5-stage cutoff values**

| Method of staging<br>(cutoff values)                          | Crude OR for<br>≥ 1 SAE at 1 year<br>(95% CI)             | Adjusted OR <sup>#</sup> for<br>≥ 1 SAE at 1 year<br>(95% CI)             | Crude OR for<br>≥ 2 SAE at 1 year<br>(95% CI)   | Adjusted OR <sup>#</sup> for<br>≥ 2 SAE at 1 year (95%<br>CI)   |
|---------------------------------------------------------------|-----------------------------------------------------------|---------------------------------------------------------------------------|-------------------------------------------------|-----------------------------------------------------------------|
| <b>Z score (5-stage)<sup>†</sup></b>                          |                                                           |                                                                           |                                                 |                                                                 |
| 1 (≥-2)                                                       | 1                                                         | 1                                                                         | 1                                               | 1                                                               |
| 2 (≥-2.5 and < -2)                                            | 0.70 (0.13-3.72)                                          | 0.66 (0.11-3.84)                                                          | NA                                              | NA                                                              |
| 3 (≥-3 and < -2.5)                                            | 9.57 (3.38-27.10)**                                       | 10.00 (3.21-31.17)**                                                      | 17.50 (2.18-140.59)*                            | 19.70 (1.88-206.86)*                                            |
| 4 (≥-4 and < -3)                                              | 4.66 (1.60-13.54)*                                        | 4.78 (1.45-15.78)*                                                        | 13.21 (1.63-106.91)*                            | 12.24 (1.09-137.92)*                                            |
| 5 (<-4)                                                       | 4.64 (1.12-19.28)*                                        | 10.66 (1.78-64.06)*                                                       | 10.71 (0.92-124.77)                             | 38.97 (1.42-1073.5)*                                            |
| <b>FEV<sub>1</sub>·Ht<sup>-3</sup> (quintile)<sup>‡</sup></b> |                                                           |                                                                           |                                                 |                                                                 |
| 1 (≥0.40)                                                     | 1                                                         | 1                                                                         | 1                                               | 1                                                               |
| 2 (≥0.32 and <0.40)                                           | 1.53 (0.41-5.71)                                          | 1.42 (0.35-5.81)                                                          | 0.98 (0.06-16.09)                               | 0.91 (0.04-19.00)                                               |
| 3 (≥0.26 and <0.32)                                           | 1.63 (0.45-5.88)                                          | 1.43 (0.36-5.75)                                                          | 2.77 (0.28-27.33)                               | 2.18 (0.16-29.54)                                               |
| 4 (≥0.21 and <0.26)                                           | 7.60 (2.39-24.19)**                                       | 5.65 (1.58-20.27)*                                                        | 10.26 (1.24-85.00)*                             | 5.65 (0.50-64.37)                                               |
| 5 (<0.21)                                                     | 4.00 (1.21-13.28)*                                        | 3.11 (0.81-11.98)                                                         | 11.80 (1.44-96.56)*                             | 7.85 (0.66-94.11)                                               |
| Method of staging<br>(cutoff values)                          | Crude OR for<br>≥ 1 SAE every year at<br>2 years (95% CI) | Adjusted OR <sup>#</sup> for<br>≥ 1 SAE every year at<br>2 years (95% CI) | Crude HR for<br>all-cause mortality<br>(95% CI) | Adjusted HR <sup>¶</sup> for<br>all-cause mortality<br>(95% CI) |
| <b>Z score (5-stage)<sup>†</sup></b>                          |                                                           |                                                                           |                                                 |                                                                 |
| 1 (≥-2)                                                       | 1                                                         | 1                                                                         | 1                                               | 1                                                               |
| 2 (≥-2.5 and < -2)                                            | NA                                                        | NA                                                                        | 1.95 (0.84-4.50)                                | 2.20 (0.94-5.14)                                                |
| 3 (≥-3 and < -2.5)                                            | 23.16 (2.91-184.11)**                                     | 33.43 (3.22-347.19)**                                                     | 2.49 (1.15-5.40)*                               | 2.49 (1.13-5.51)*                                               |
| 4 (≥-4 and < -3)                                              | 12.25 (1.51-99.23)*                                       | 20.00 (1.87-214.03)*                                                      | 3.12 (1.51-6.48)**                              | 3.86 (1.77-8.41)**                                              |
| 5 (<-4)                                                       | 5.19 (0.31-87.29)                                         | 23.25 (0.86-625.93)                                                       | 1.34 (0.29-6.12)                                | 5.98 (1.01-35.30)*                                              |
| <b>FEV<sub>1</sub>·Ht<sup>-3</sup> (quintile)<sup>‡</sup></b> |                                                           |                                                                           |                                                 |                                                                 |
| 1 (≥0.40)                                                     | 1                                                         | 1                                                                         | 1                                               | 1                                                               |
| 2 (≥0.32 and <0.40)                                           | 2.89 (0.29-28.67)                                         | 3.27 (0.28-37.71)                                                         | 1.97 (0.62-6.28)                                | 1.68 (0.52-5.45)                                                |
| 3 (≥0.26 and <0.32)                                           | 2.61 (0.26-25.81)                                         | 2.72 (0.23-31.60)                                                         | 3.68 (1.24-10.95)*                              | 2.64 (0.87-8.02)                                                |
| 4 (≥0.21 and <0.26)                                           | 11.63 (1.42-95.56)*                                       | 11.73 (1.20-114.36)*                                                      | 5.15 (1.76-15.09)**                             | 3.38 (1.13-10.13)*                                              |
| 5 (<0.21)                                                     | 8.63 (1.02-72.86)*                                        | 10.76 (1.03-112.96)*                                                      | 4.33 (1.45-12.87)*                              | 2.94 (0.96-9.02)                                                |

FEV<sub>1</sub>, forced expiratory volume in 1 second; FEV<sub>1</sub>·Ht<sup>-3</sup>, FEV<sub>1</sub> over height cubed; OR, odds ratio; HR, hazard ratio; SAE, severe acute exacerbation; 95% CI, 95% confidence interval; NA, statistical estimates could not be obtained due to too few the event counts. <sup>†</sup> : The five-stage cutoff values were proposed by Quanjer *et al* [1]. <sup>‡</sup> : The use of quintiles of FEV<sub>1</sub>·Ht<sup>-3</sup> was proposed by Pedone *et al* [2]. <sup>#</sup> : Adjusted for age, body mass index, Charlson comorbidity index, smoking status, and history of severe acute exacerbation in the preceding year. <sup>¶</sup> : Adjusted for age, body mass index, Charlson comorbidity

### REFERENCES FOR SUPPLEMENTARY TABLE S3:

- 1 Quanjer PH, Pretto JJ, Brazzale DJ, *et al.* Grading the severity of airways obstruction: new wine in new bottles. *Eur Respir J* 2014; 43: 505–512.
- 2 Pedone C, Scarlata S, Scichilone N, *et al.* Alternative ways of expressing FEV<sub>1</sub> and mortality in elderly people with and without COPD. *Eur Respir J* 2013; 41: 800–805.
