# Supplementary material
Source: HighWire-hosted journal article supplement (https://erj.ersjournals.com/content/51/3/1700577)
Supplement: inline-supplementary-material-6 [file inline-supplementary-material-6.pdf]

**SUPPLEMENTARY TABLE S4** Single- and multi-variate logistic regression assessing the risks of having at least one episode of severe acute exacerbation at two years and at three years of follow-up

| Method of staging<br>(cutoff values)                 | Crude OR for<br>≥ 1 SAE at 2 years<br>(95% CI) | Adjusted OR <sup>#</sup> for<br>≥ 1 SAE at 2 years<br>(95% CI) | Crude OR for<br>≥ 1 SAE at 3 years<br>(95% CI) | Adjusted OR <sup>#</sup> for<br>≥ 1 SAE at 3 years<br>(95% CI) |
|------------------------------------------------------|------------------------------------------------|----------------------------------------------------------------|------------------------------------------------|----------------------------------------------------------------|
| <b>FEV<sub>1</sub>%pred (GOLD)</b>                   |                                                |                                                                |                                                |                                                                |
| 1 (≥80%)                                             | 1                                              | 1                                                              | 1                                              | 1                                                              |
| 2 (≥50% and <80)                                     | 1.02 (0.38-2.76)                               | 0.92 (0.32-2.67)                                               | 0.79 (0.30-2.09)                               | 0.66 (0.24-1.82)                                               |
| 3 (≥30% and <50)                                     | 2.32 (0.87-6.18)                               | 1.84 (0.63-5.37)                                               | 1.90 (0.72-5.03)                               | 1.37 (0.50-3.78)                                               |
| 4 (<30%)                                             | 0.74 (0.16-3.35)                               | 0.57 (0.11-2.96)                                               | 1.17 (0.30-4.60)                               | 0.81 (0.19-3.47)                                               |
| <b>FEV<sub>1</sub>%pred(quartiles)</b>               |                                                |                                                                |                                                |                                                                |
| 1 (≥69.3%)                                           | 1                                              | 1                                                              | 1                                              | 1                                                              |
| 2 (≥53.6% and <69.3)                                 | 1.12 (0.47-2.67)                               | 0.93 (0.37-2.32)                                               | 0.93 (0.39-2.20)                               | 0.78 (0.32-1.89)                                               |
| 3 (≥41.0% and <53.6)                                 | 2.70 (1.22-5.96)*                              | 2.17 (0.94-4.99)                                               | 2.27 (1.02-5.03)*                              | 1.84 (0.81-4.19)                                               |
| 4 (<41.0%)                                           | 1.77 (0.78-4.00)                               | 1.42 (0.58-3.51)                                               | 1.93 (0.88-4.23)                               | 1.41 (0.60-3.29)                                               |
| <b>Z score</b>                                       |                                                |                                                                |                                                |                                                                |
| 1 (≥-1.70)                                           | 1                                              | 1                                                              | 1                                              | 1                                                              |
| 2 (≥-2.57 and < -1.70)                               | 0.89 (0.38-2.12)                               | 0.73 (0.30-1.81)                                               | 0.78 (0.33-1.82)                               | 0.63 (0.26-1.50)                                               |
| 3 (≥-3.17 and < -2.57)                               | 3.09 (1.43-6.71)**                             | 2.58 (1.13-5.89)*                                              | 2.13 (0.97-4.69)                               | 1.67 (0.73-3.80)                                               |
| 4 (<-3.17)                                           | 1.28 (0.56-2.90)                               | 1.24 (0.49-3.15)                                               | 1.78 (0.81-3.88)                               | 1.51 (0.63-3.60)                                               |
| <b>(FEV<sub>1</sub>·Ht<sup>-2</sup>)<sub>A</sub></b> |                                                |                                                                |                                                |                                                                |
| 1 (≥0.63)                                            | 1                                              | 1                                                              | 1                                              | 1                                                              |
| 2 (≥0.47 and <0.63)                                  | 1.30 (0.57-2.96)                               | 1.00 (0.41-2.44)                                               | 1.55 (0.67-3.56)                               | 1.35 (0.56-3.26)                                               |
| 3 (≥0.36 and <0.47)                                  | 2.02 (0.91-4.49)                               | 1.40 (0.58-3.37)                                               | 2.06 (0.91-4.66)                               | 1.56 (0.65-3.74)                                               |
| 4 (<0.36)                                            | 1.96 (0.85-4.52)                               | 1.38 (0.54-3.43)                                               | 2.27 (0.98-5.24)                               | 1.63 (0.66-4.05)                                               |
| <b>(FEV<sub>1</sub>·Ht<sup>-2</sup>)<sub>B</sub></b> |                                                |                                                                |                                                |                                                                |
| 1 (≥0.50)                                            | 1                                              | 1                                                              | 1                                              | 1                                                              |
| 2 (≥0.40 and < 0.30)                                 | 1.44 (0.69-2.97)                               | 1.15 (0.53-2.48)                                               | 1.40 (0.67-2.90)                               | 1.13 (0.52-2.43)                                               |
| 3 (≥0.30 and < 0.40)                                 | 2.37 (1.19-4.69)*                              | 1.87 (0.89-3.94)                                               | 2.17 (1.10-4.30)*                              | 1.72 (0.83-3.58)                                               |
| 4 (< 0.30)                                           | 1.34 (0.51-3.52)                               | 1.04 (0.36-3.02)                                               | 1.52 (0.58-3.98)                               | 1.09 (0.38-3.14)                                               |
| <b>FEV<sub>1</sub>·Ht<sup>-3</sup></b>               |                                                |                                                                |                                                |                                                                |
| 1 (≥0.38)                                            | 1                                              | 1                                                              | 1                                              | 1                                                              |
| 2 (≥0.29 and <0.38)                                  | 1.21 (0.54-2.70)                               | 0.99 (0.42-2.34)                                               | 1.51 (0.67-3.42)                               | 1.33 (0.57-3.10)                                               |
| 3 (≥0.22 and <0.29)                                  | 1.83 (0.86-3.93)                               | 1.35 (0.59-3.10)                                               | 1.76 (0.80-3.83)                               | 1.36 (0.59-3.12)                                               |
| 4 (<0.22)                                            | 1.58 (0.70-3.58)                               | 1.10 (0.44-2.73)                                               | 2.04 (0.90-4.60)                               | 1.44 (0.60-3.47)                                               |

**FEV<sub>1</sub>Q**

|                                |                   |                  |                   |                  |
|--------------------------------|-------------------|------------------|-------------------|------------------|
| 1 ( $\geq 3.38$ )              | 1                 | 1                | 1                 | 1                |
| 2 ( $\geq 2.50$ and $< 3.38$ ) | 1.63 (0.70-3.80)  | 1.35 (0.54-3.40) | 1.75 (0.74-4.14)  | 1.59 (0.64-3.95) |
| 3 ( $\geq 1.90$ and $< 2.50$ ) | 2.07 (0.91-4.74)  | 1.46 (0.59-3.64) | 2.25 (0.97-5.21)  | 1.81 (0.73-4.45) |
| 4 ( $< 1.90$ )                 | 2.37 (1.04-5.41)* | 1.72 (0.68-4.37) | 2.65 (1.15-6.12)* | 2.03 (0.82-5.04) |

**69 patients had at least 1 episode of SAE at 2 years of follow-up, and 75 patients had at least 1 episode of SAE at 3 years of follow-up.** FEV<sub>1</sub>, forced expiratory volume in 1 second; FEV<sub>1</sub>%pred, percentage of predicted FEV<sub>1</sub>; FEV<sub>1</sub>·Ht<sup>2</sup>, FEV<sub>1</sub> over height squared; FEV<sub>1</sub>·Ht<sup>3</sup>, FEV<sub>1</sub> over height cubed; FEV<sub>1</sub>Q, FEV<sub>1</sub> quotient; GOLD, the Global Initiative for Chronic Obstructive Lung Disease; OR, odds ratio; SAE, severe acute exacerbation; 95% CI, 95% confidence interval.

# : Adjustment was made for age, body mass index, Charlson comorbidity index, smoking status, and history of SAE in the preceding year. \* :  $P < 0.05$ ; \*\* :  $P < 0.005$ .
